# Supplementary material
Source: bioRxiv or medRxiv preprint supplement (https://www.biorxiv.org/highwire/filestream/11324/field_highwire_adjunct_files/3/041780-4.pdf)
Supplement: Supplementary file [file 041780-4.pdf]

|           |    |                                         |      |      |      |      |      |      |      |       |       |       |       |       |        |        |        |        |
|-----------|----|-----------------------------------------|------|------|------|------|------|------|------|-------|-------|-------|-------|-------|--------|--------|--------|--------|
| P06.1711* | 14 | HBRR DTHL B15YA                         | 0.40 | 0.53 | 0.64 | 0.75 | 0.89 | 1.08 | 1.38 | 1.82  | 2.47  | 3.42  | 4.82  | 6.75  | 9.37   | 13.00  | 18.10  | 25.20  |
| P06.1712* | 15 | HBRR DTHL B15YE                         | 0.34 | 0.38 | 0.53 | 0.71 | 0.94 | 1.23 | 1.67 | 2.30  | 3.24  | 4.62  | 6.54  | 9.19  | 12.90  | 18.10  | 25.20  | 35.00  |
| P06.1713* | 14 | NAVY D106                               | 0.89 | 0.36 | 1.80 | 1.44 | 1.11 | 0.83 | 0.61 | 0.45  | 0.34  | 0.26  | 0.20  | 0.15  | 0.11   | 0.08   | 0.06   | 0.05   |
| P06.1714* | 15 | NAVY D106 M175F                         | 0.56 | 0.84 | 1.24 | 1.80 | 2.64 | 3.96 | 5.94 | 8.82  | 13.23 | 19.84 | 29.76 | 44.64 | 67.92  | 103.44 | 157.92 | 241.44 |
| P06.1715* | 15 | NAVY D106 M175F                         | 0.75 | 0.89 | 0.98 | 0.98 | 0.98 | 0.71 | 0.56 | 0.45  | 0.34  | 0.26  | 0.20  | 0.15  | 0.11   | 0.08   | 0.06   | 0.05   |
| P06.1716* | 14 | D11L D159N                              | 1.21 | 0.93 | 0.49 | 0.20 | 0.40 | 0.70 | 1.08 | 1.62  | 2.40  | 3.60  | 5.40  | 8.10  | 12.15  | 18.22  | 27.33  | 41.00  |
| P06.1717* | 15 | NAVY D106 M181L M184G                   | 0.25 | 0.51 | 0.65 | 0.77 | 0.93 | 1.13 | 1.39 | 1.73  | 2.16  | 2.70  | 3.42  | 4.30  | 5.40   | 6.84   | 8.70   | 11.10  |
| P06.1721* | 12 | D106M D11L D106N                        | 1.06 | 1.34 | 0.70 | 0.26 | 0.24 | 0.04 | 0.01 | 0.01  | 0.01  | 0.01  | 0.01  | 0.01  | 0.01   | 0.01   | 0.01   | 0.01   |
| P06.1723* | 11 | HBRR D11L D106V N156G E157A N180G       | 0.57 | 0.55 | 0.78 | 0.70 | 1.04 | 1.40 | 1.91 | 2.58  | 3.51  | 4.80  | 6.48  | 8.70  | 11.64  | 15.72  | 21.42  | 29.10  |
| P06.1724* | 10 | D106M D11L D106V N156G E157A N180G      | 0.61 | 0.30 | 1.10 | 0.70 | 1.06 | 1.49 | 2.09 | 2.91  | 3.99  | 5.40  | 7.29  | 9.90  | 13.23  | 17.70  | 23.82  | 32.40  |
| P06.1725* | 10 | D11L D106V N156G E157A N180G            | 0.86 | 0.19 | 0.78 | 0.47 | 0.71 | 1.01 | 1.41 | 1.94  | 2.64  | 3.60  | 4.89  | 6.60  | 8.91   | 12.00  | 16.11  | 21.42  |
| P06.1725* | 12 | HBRR D106 R11HL E124E                   | 0.44 | 0.64 | 0.71 | 0.61 | 0.59 | 0.46 | 0.42 | 0.33  | 0.26  | 0.20  | 0.15  | 0.11  | 0.08   | 0.06   | 0.05   | 0.04   |
| P06.1726* | 14 | NAVY D106 M181L E181E                   | 0.60 | 1.09 | 1.69 | 2.60 | 3.96 | 5.94 | 8.82 | 13.23 | 19.84 | 29.76 | 44.64 | 67.92 | 103.44 | 157.92 | 241.44 | 350.00 |
| P06.1726* | 15 | NAVY D106 M181L E181E M184G             | 1.13 | 1.41 | 1.61 | 1.65 | 1.65 | 1.01 | 0.75 | 0.56  | 0.45  | 0.34  | 0.26  | 0.20  | 0.15   | 0.11   | 0.08   | 0.06   |
| P06.1726* | 15 | HBRR D11L D106V N156G E157A D106N N180G | 2.11 | 1.75 | 1.04 | 0.38 | 0.41 | 0.01 | 0.01 | 0.01  | 0.01  | 0.01  | 0.01  | 0.01  | 0.01   | 0.01   | 0.01   | 0.01   |
| P06.1726* | 15 | D11L D106V N156G E157A M181W N180G      | 0.60 | 0.78 | 1.01 | 0.91 | 1.09 | 1.45 | 1.96 | 2.64  | 3.60  | 4.89  | 6.60  | 8.91  | 12.00  | 16.11  | 21.42  | 29.10  |
| P06.1731* | 15 | HBRR D114E                              | 0.19 | 0.31 | 0.39 | 0.39 | 0.39 | 0.13 | 0.10 | 0.08  | 0.06  | 0.05  | 0.04  | 0.03  | 0.02   | 0.02   | 0.01   | 0.01   |
| P06.1732* | 16 | M181L E181E M175F                       | 0.16 | 0.16 | 0.28 | 0.28 | 0.28 | 0.28 | 0.28 | 0.28  | 0.28  | 0.28  | 0.28  | 0.28  | 0.28   | 0.28   | 0.28   | 0.28   |
| P06.1733* | 10 | D106V M181L E181E N180H                 | 0.04 | 0.09 | 0.43 | 0.81 | 1.23 | 1.80 | 2.64 | 3.96  | 5.94  | 8.82  | 13.23 | 19.84 | 29.76  | 44.64  | 67.92  | 103.44 |
| P06.1733* | 11 | QBRR M175F M184G                        | 0.56 | 0.51 | 0.50 | 0.55 | 0.55 | 0.55 | 0.55 | 0.55  | 0.55  | 0.55  | 0.55  | 0.55  | 0.55   | 0.55   | 0.55   | 0.55   |
| P06.1733* | 15 | QBRR M175F M184G                        | 0.25 | 0.76 | 0.69 | 0.53 | 0.55 | 0.55 | 0.55 | 0.55  | 0.55  | 0.55  | 0.55  | 0.55  | 0.55   | 0.55   | 0.55   | 0.55   |
| P06.1736* | 12 | A155 M175F                              | 0.86 | 0.86 | 1.71 | 1.69 | 1.69 | 1.69 | 1.69 | 1.69  | 1.69  | 1.69  | 1.69  | 1.69  | 1.69   | 1.69   | 1.69   | 1.69   |
| P06.1736* | 15 | A155 M175F M184G                        | 0.19 | 0.20 | 0.41 | 0.41 | 0.41 | 0.41 | 0.41 | 0.41  | 0.41  | 0.41  | 0.41  | 0.41  | 0.41   | 0.41   | 0.41   | 0.41   |
| P06.1738* | 14 | A105F M175F M184G                       | 1.13 | 0.89 | 0.79 | 0.56 | 0.65 | 0.78 | 0.97 | 1.26  | 1.68  | 2.25  | 3.00  | 4.05  | 5.40   | 7.20   | 9.45   | 12.60  |
| P06.1739* | 15 | A105F M175F M184G                       | 1.24 | 1.17 | 0.86 | 0.26 | 0.23 | 0.01 | 0.01 | 0.01  | 0.01  | 0.01  | 0.01  | 0.01  | 0.01   | 0.01   | 0.01   | 0.01   |
| P06.1740* | 14 | HBRR D11L B15YA E105W N156G E157A N180G | 0.19 | 0.30 | 1.09 | 0.71 | 0.65 | 0.45 | 0.34 | 0.26  | 0.20  | 0.15  | 0.11  | 0.08  | 0.06   | 0.05   | 0.04   | 0.03   |
| P06.1741* | 20 | HBRR D11L D106V N156G E157A M181W N180G | 0.25 | 0.82 | 1.23 | 0.43 | 0.61 | 0.85 | 1.21 | 1.73  | 2.40  | 3.30  | 4.50  | 6.15  | 8.32   | 11.34  | 15.48  | 21.00  |
| P06.1741* | 21 | D106M D11L D106N M175F                  | 0.65 | 0.58 | 0.57 | 0.50 | 0.46 | 0.44 | 0.41 | 0.39  | 0.36  | 0.34  | 0.32  | 0.30  | 0.28   | 0.26   | 0.24   | 0.22   |
| P06.1742* | 15 | D106V Q100L D106V M184G N180H           | 0.83 | 0.79 | 0.63 | 0.52 | 0.44 | 0.36 | 0.30 | 0.24  | 0.19  | 0.14  | 0.10  | 0.07  | 0.05   | 0.04   | 0.03   | 0.02   |
